# Supplementary material
Source: PubMed Central journal article supplement (PMC2781712)
Supplement: supp_M109.001016_jbc.M109.001016-1.pdf [file supp_M109.001016_jbc.M109.001016-1.pdf]

**Supplemental Figure 1. No evidence of an effect of IL-4 on TRAP mRNA stability.** Upper panel, schematic of RNA stability experimental design. Lower panel, RANK-RAW264.7 cells and primary BMMs were treated with M-CSF and RANKL for 4 or 7 days respectively. TRAP expression was fully induced. Cells were treated with or without IL-4 for one additional day. Cells were treated with 5µg/ml actinomycin D for various times as shown before harvest of total RNA. The abundance of TRAP mRNA was analyzed by RT-PCR.

**Supplemental Figure 2. Effect of WT STAT6 on the TRAP promoter.** RAW264.7 cells were transfected with 2µg PKB5 with or without 1µg cDNA encoding 3 key transcription factors PU.1, NFATc1 and MITF. In some cases, the cells were also transfected with the cDNA encoding wild type STAT6. The cells were cultured overnight in the presence or absence of IL-4 (10 ng/ml) before analysis of the relative luciferase activity. The luciferase activity calculated for the luciferase vector alone group was normalized to 1. Results represent the mean +/- SD of triplicate samples. \*, p<0.05. \*\*, p<0.01.

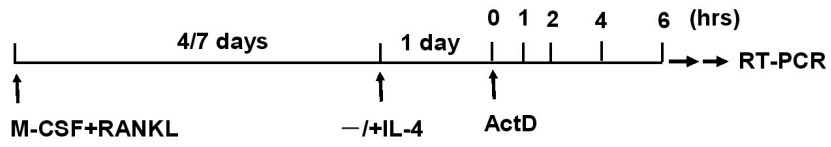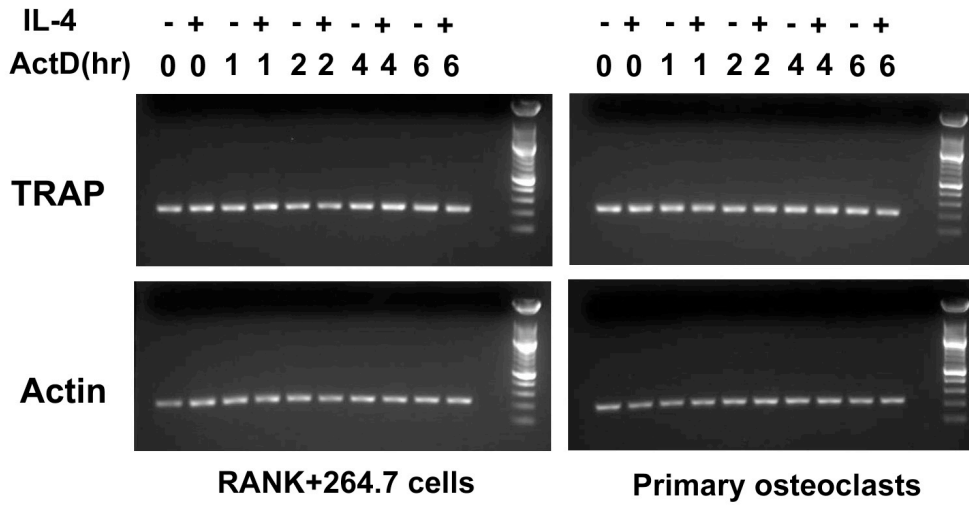

Supplemental Figure 1

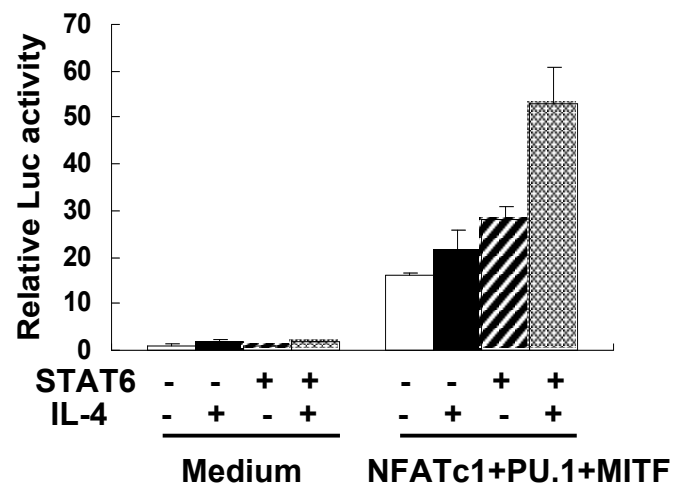

Supplemental Figure 2
